# Supplementary material for: Gene Expression Profiling of Clostridium botulinum under Heat Shock Stress
Source: Biomed Res Int. 2013 Sep 30;2013:760904. doi: 10.1155/2013/760904 (PMC3806222; doi:10.1155/2013/760904)
Supplement: Supplementary file 1 — Table S1. The primers for quantitative real-time PCR Table S2. Genes induced two folds or more different in response to heat shock stress in Clostridium botulinum ATCC 3502 [file 760904.f1.zip]

Archive with 2 entries (2 files):
- 760904/2013-09-03/Table_S1_2738_608594.doc
- 760904/2013-09-03/Table_S2_2738_608595.doc
